# Supplementary material for: Experimental and computational thermochemistry: how strong is the intramolecular hydrogen bond in alkyl 2-hydroxybenzoates (salicylates)
Source: Royal Society of Chemistry journal article supplement (doi:10.1039/d3cp01677c), 2023-01-01
Supplement: d3cp01677c1.pdf [file d3cp01677c1.pdf]

*Electronic Supplementary materials*

**Experimental and computational thermochemistry: how strong is the intramolecular hydrogen bond in alkyl 2-hydroxybenzoates (salicylates)?**

Sergey P. Verevkin,<sup>a,c,\*</sup> Svetlana V. Portnova,<sup>b</sup> Vladimir N. Emel'yanenko,<sup>a</sup> Ruslan N. Nagrimanov,<sup>c</sup> Mikhail A. Varfolomeev<sup>c,d</sup>

<sup>a</sup> Competence Centre CALOR, Department Life, Light & Matter of Faculty of Interdisciplinary Research at University of Rostock, 18059, Rostock, Germany

<sup>b</sup> Chemical-Technological Department, Samara State Technical University, Samara 443100, Russia

<sup>c</sup> Department of Physical Chemistry, Kazan Federal University, 420008 Kazan, Russia

<sup>d</sup> Department of Petroleum Engineering, Kazan Federal University, 420008 Kazan, Russia

**Table S1 Provenance and Purity of the Materials**

| Material                           | CAS       | Origin      | GC purity<br>(mass fraction) |
|------------------------------------|-----------|-------------|------------------------------|
| methyl-2-hydroxybenzoate           | 119-36-8  | Acros, 99%  | 0.9999                       |
| ethyl-2-hydroxybenzoate            | 118-61-6  | Acros, 99+% | 0.9995                       |
| <i>n</i> -propyl-2-hydroxybenzoate | 607-90-9  | Acros, 99+% | 0.9991                       |
| <i>n</i> -butyl-2-hydroxybenzoate  | 2052-14-4 | TCI, 99%    | 0.9996                       |

**Combustion calorimetry: enthalpy of formation determination**

The standard molar energy of combustion was measured with a self-made high-precision isoperibolic calorimeter with a static bomb and a stirred water bath. The liquid sample was transferred (in the glove box) with a syringe into the polyethylene bulb (Fa. NeoLab, Heidelberg, Germany). The neck of the bulb was compressed with special tweezers and sealed by heating the neck near a glowing wire. The bulb with the liquid sample was placed in the crucible and burnt in oxygen at a pressure of 3.04 MPa. The bomb was not preliminary purged with oxygen. Test experiments with and without purging with O<sub>2</sub> showed results consistent within the experimental uncertainty. The detailed procedure has been described previously<sup>9, 10</sup>. The combustion products were examined for carbon monoxide (Dräger tube) and unburned carbon, but neither was detected. The energy equivalent of the calorimeter  $\varepsilon_{\text{calor}} = (14904.0 \pm 0.5) \text{ J} \cdot \text{K}^{-1}$  was determined with a standard reference sample of benzoic acid (sample SRM 39j, NIST). Correction for nitric acid formation was based on titration with 0.1 mol·dm<sup>-3</sup> NaOH (aq). Conventional procedures<sup>11</sup> were used for reduction of the data to standard conditions. Auxiliary data required for the reduction are collected in Table S2.

**Table S2** Auxiliary quantities: formula, density  $\rho$  (293 K), massic heat capacity  $c_p$  (298.15 K), and expansion coefficients  $(\delta V/\delta T)_p$  of the materials used in the present study<sup>a</sup>

| Materials                          | Formula                                | Water | $\rho$ (293 K)                | $c_p$ (298.15 K) <sup>b</sup>             | $(\delta V/\delta T)_p$ <sup>c</sup>                          |
|------------------------------------|----------------------------------------|-------|-------------------------------|-------------------------------------------|---------------------------------------------------------------|
|                                    |                                        | ppm   | $\text{g}\cdot\text{cm}^{-3}$ | $\text{J}\cdot\text{K}^{-1}\text{g}^{-1}$ | $10^{-3}\cdot\text{cm}^3\cdot\text{K}^{-1}\cdot\text{g}^{-1}$ |
| methyl 2-hydroxybenzoate           | $\text{C}_8\text{H}_8\text{O}_3$       | 134.1 | 1.179 <sup>1</sup>            | 1.61                                      | 1.0                                                           |
| ethyl 2-hydroxybenzoate            | $\text{C}_9\text{H}_{10}\text{O}_3$    | 103.6 | 1.125 <sup>2</sup>            | 1.70                                      | 1.0                                                           |
| <i>n</i> -propyl 2-hydroxybenzoate | $\text{C}_{10}\text{H}_{12}\text{O}_3$ | 112.4 | 1.10 <sup>3</sup>             | 1.66                                      | 1.0                                                           |
| <i>n</i> -butyl 2-hydroxybenzoate  | $\text{C}_{11}\text{H}_{14}\text{O}_3$ | 98.6  | 1.025 <sup>4</sup>            | 1.71                                      | 1.0                                                           |
| polyethylene                       | $\text{CH}_{1.93}$                     |       | 0.92                          | 2.53                                      | 0.1                                                           |
| cotton                             | $\text{CH}_{1.774}\text{O}_{0.887}$    |       | 1.50                          | 1.67                                      | 0.1                                                           |

<sup>a</sup> Data for the densities,  $\rho$  (293 K), and the specific heat capacities,  $c_p$  (298.15 K), of auxiliary materials are from our previous work<sup>5</sup>. The specific energy of combustion  $\Delta_c u^0$  (cotton) = -16945.2  $\text{J}\cdot\text{g}^{-1}$ ;  $u(\Delta_c u^0) = 4.2 \text{ J}\cdot\text{g}^{-1}$ . The specific energy of combustion  $\Delta_c u^0$  (polyethylene) = -46357.3  $\text{J}\cdot\text{g}^{-1}$ ;  $u(\Delta_c u^0) = 3.5 \text{ J}\cdot\text{g}^{-1}$ . The standard uncertainties are reported for the specific energies of combustion.

<sup>c</sup> Calculated from the molar heat capacity at 298.15 K (see Table S3).

<sup>d</sup> Estimated.

### Transpiration method

Absolute vapour pressures were measured using the transpiration method<sup>12, 13</sup>. The main idea of this method is to saturate the gas stream flowing over the sample and to determine the amount of compound transferred by the gas within a given time. Approximately 0.5 to 0.8 g of the sample is mixed with glass beads (diameter 1 mm) and placed in the thermostatted U-shaped saturator. The glass beads are needed to enlarge the contact area between gas and sample. A stream of nitrogen at a well-defined flow rate was passed through the saturator at constant temperature ( $\pm 0.1 \text{ K}$ ) maintained by Julabo FP51-SL refrigerated circulator, and the transported material was collected in a cold trap. The amount of condensed substance was usually determined by GC using a suitable *n*-alkane as an internal standard. The saturation vapour pressure  $p_i$  at each temperature  $T_i$  was calculated from the amount of condensate collected within a definite period of time:

$$p_i = m_i \cdot R \cdot T_a / V \cdot M_i; \quad V = (n_{\text{N}_2} + n_i) \cdot R \cdot T_a / P_a \quad (\text{S1})$$

where  $V$  is the volume of the gas phase consisting of the  $n_{\text{N}_2}$  moles of the carrier gas and  $n_i$  mole of gaseous compound under study (with the molar mass  $M_i$ ) at the atmospheric pressure  $P_a$  and the ambient temperature  $T_a$ . The volume of the carrier gas  $V_{\text{N}_2}$  was determined by the digital flow rate sensor from integration with a microcontroller. We used the Honeywell S&C - HAFBLF0200C2AX5 digital flow rate sensor with uncertainty at the level of 2.5 %. The flow rate of the nitrogen stream was also controlled by using a soap bubble flow meter (HP soap film flowmeter (model 0101-0113)) and optimized in order to reach the saturation equilibrium of the transporting gas at each temperature under study. The volume of the carrier gas  $V_{\text{N}_2}$  was read from the digital flow sensor. The amount of the compound under investigation  $n_i$  in the carrier gas was estimated at each temperature using the ideal gas law.

Before starting the vapour pressure measurements, the sample was first pre-conditioned at 310-320 K (within about one hour) in order to remove possible traces of water. The saturator was then kept at 310-315 K (to remove possible traces of volatile compounds). To ensure that preconditioning was completed at the selected temperature, three samples were taken sequentially during sample rinsing and analyzed by GC. A constant vapour pressure at this temperature indicated that the transpiration experiments could begin. GC analysis of the transported material did not reveal any additional contamination. The absence of impurities and decomposition products was re-checked by GC analysis of the saturator content at the end of the entire series of experiments.

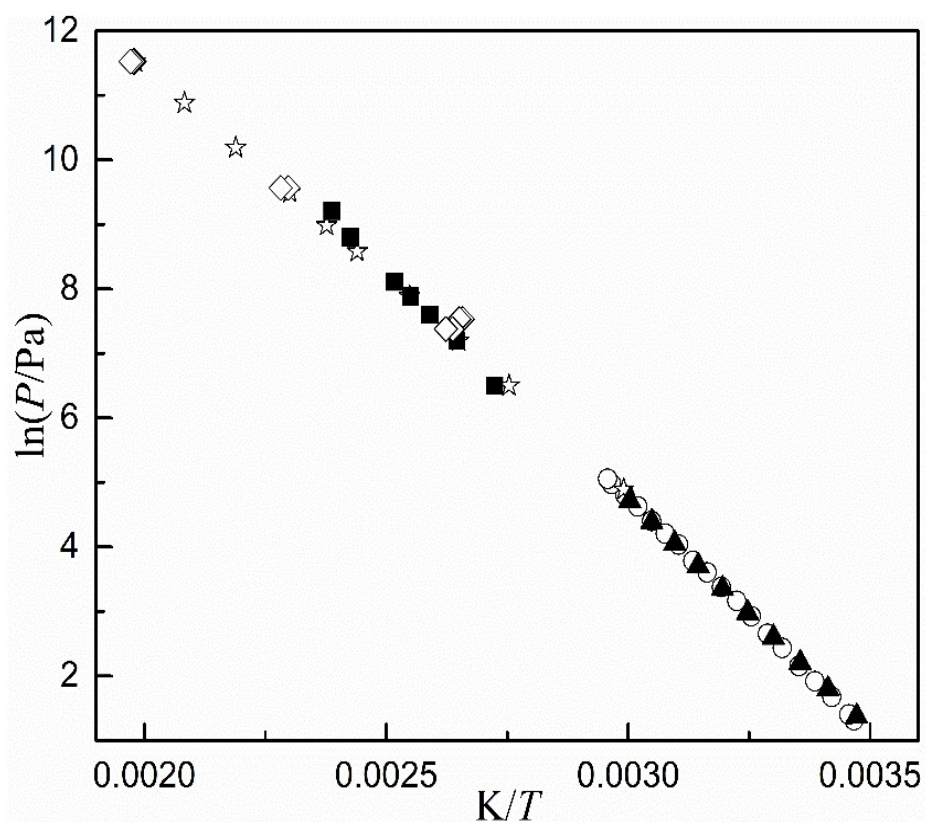

**Fig. S1** The temperature dependence of vapour pressures over the liquid sample of ethyl 2-hydroxybenzoate:

○ - this work; ▲ - Ref. <sup>14</sup>; ☆ - Ref. <sup>15</sup>; ■ - Ref. <sup>16</sup>; ◇ - Ref. <sup>17</sup>.

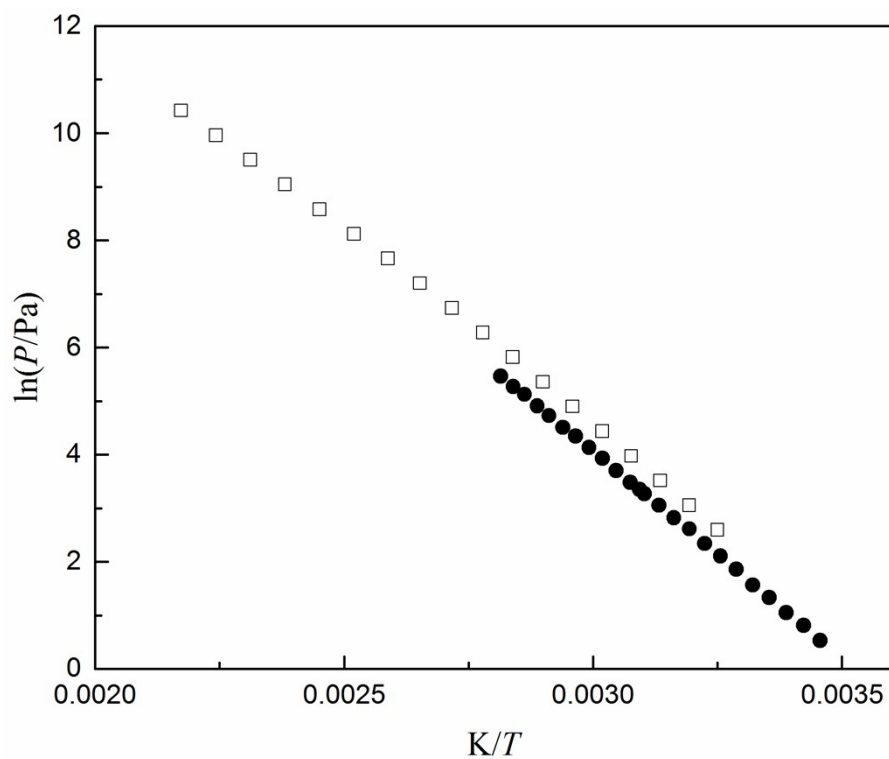

**Fig. S2** The temperature dependence of vapour pressures over the liquid sample of *n*-propyl 2-hydroxybenzoate:

● - this work; □ - Ref. <sup>18</sup>.

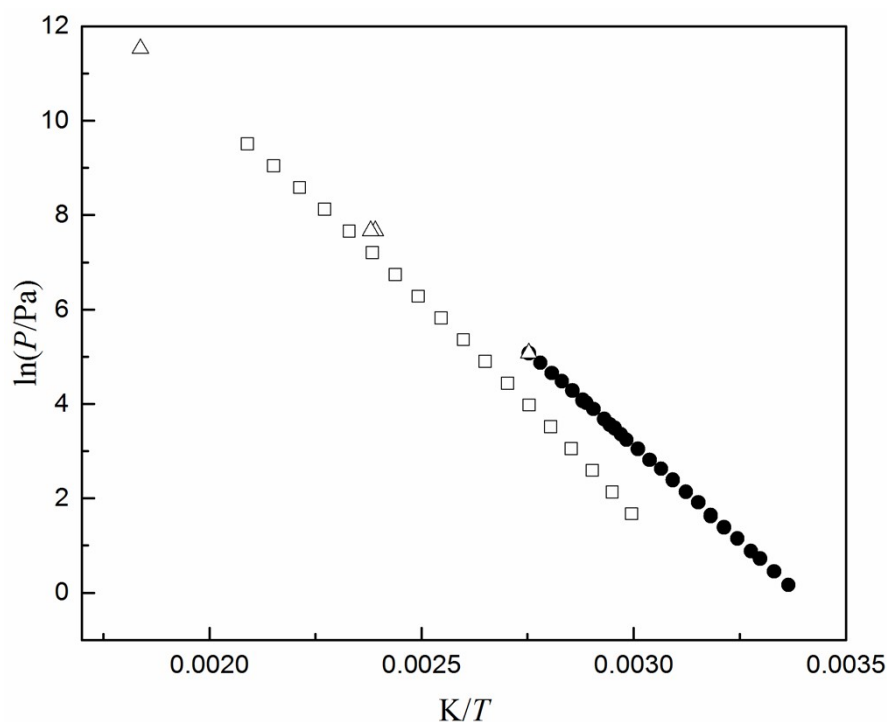

**Fig. S3** The temperature dependence of vapour pressures over the liquid sample of *n*-butyl 2-hydroxybenzoate:

● - this work; △ - Ref. <sup>17</sup>; □ – Ref. <sup>18</sup>

#### Adjustment of vaporisation enthalpies to the reference temperature $T = 298.18$ K

The vaporisation enthalpies, which are derived from the experimental vapor pressure-temperature dependencies according to the Clausius–Clapeyron relation, are referenced to the average temperature,  $T_{av}$ , of the examined interval. For engineering calculations, these enthalpies should be adjusted to the reference temperature  $T = 298.15$  K. The enthalpies of vaporisation are derived using the following equation:

$$\Delta_l^g H_m^o(T) = -b + \Delta_l^g C_{p,m}^o \times T \quad (S2)$$

The  $\Delta_l^g C_{p,m}^o$ -values used in Eq. (S2) are usually derived according to empirical equations developed by Chickos and Acree <sup>8</sup>.

$$\Delta_l^g C_{p,m}^o(298.15 \text{ K}) = -0.26 \times C_{p,m}^o(\text{liq}, 298.15 \text{ K}) - 10.58 \quad (S3)$$

where  $C_{p,m}^o(\text{liq}, 298.15 \text{ K})$  values (see Table S3) are of experimental origin or they can be also estimated according to the group-additivity procedure <sup>7</sup>.

**Table S3** Compilation of data on molar heat capacities  $C_{p,m}^o(\text{liq})$  and heat capacity differences  $\Delta_l^g C_{p,m}^o$  (in  $\text{J} \cdot \text{K}^{-1} \cdot \text{mol}^{-1}$ ) at  $T = 298.15$  K

| Compounds                            | $C_{p,m}^o(\text{liq})$ | $-\Delta_l^g C_{p,m}^o$ |
|--------------------------------------|-------------------------|-------------------------|
| methyl 2-hydroxybenzoate             | 244.3 <sup>1</sup>      | 72.0 <sup>6</sup>       |
| ethyl 2-hydroxybenzoate              | 283.1 <sup>2</sup>      | 84.2 <sup>b</sup>       |
| <i>n</i> -propyl 2-hydroxybenzoate   | 300 <sup>a</sup>        | 88.6 <sup>b</sup>       |
| <i>n</i> -butyl 2-hydroxybenzoate    | 332 <sup>a</sup>        | 96.9 <sup>b</sup>       |
| <i>n</i> -pentyl 2-hydroxybenzoate   | 371.9 <sup>a</sup>      | 107.3                   |
| <i>iso</i> -pentyl 2-hydroxybenzoate | 365.4 <sup>a</sup>      | 105.6                   |

<sup>a</sup> Calculated according to group-additivity procedure developed by Chickos *et al.* <sup>7</sup> based on the heat capacity of methyl 2-hydroxybenzoate

<sup>b</sup> Calculated according to empirical procedure developed by Chickos *et al.* <sup>8</sup>.

**Table S4** Absolute vapour pressures  $p$ , and standard vaporisation enthalpies and entropies obtained by the transpiration method.

| $T/$<br>K <sup>a</sup>                                                                                                | $m/$<br>mg <sup>b</sup> | $V(N_2)^c /$<br>dm <sup>3</sup> | $T_a/$<br>K <sup>d</sup> | Flow/<br>dm <sup>3</sup> ·h <sup>-1</sup> | $p/$<br>Pa <sup>e</sup> | $u(p)/$<br>Pa <sup>f</sup> | $\Delta_l^g H_m^o/$<br>kJ·mol <sup>-1</sup> | $\Delta_l^g S_m^o/$<br>J·K <sup>-1</sup> ·mol <sup>-1</sup> |
|-----------------------------------------------------------------------------------------------------------------------|-------------------------|---------------------------------|--------------------------|-------------------------------------------|-------------------------|----------------------------|---------------------------------------------|-------------------------------------------------------------|
| ethyl 2-hydroxybenzoate; $\Delta_l^g H_m^o(298.15 \text{ K}) = (62.1 \pm 0.3) \text{ kJ} \cdot \text{mol}^{-1}$       |                         |                                 |                          |                                           |                         |                            |                                             |                                                             |
| $\ln(p/p_{ref}) = \frac{310.5}{R} - \frac{87191.8}{RT} - \frac{84.2}{R} \ln \frac{T}{298.15}; p_{ref} = 1 \text{ Pa}$ |                         |                                 |                          |                                           |                         |                            |                                             |                                                             |
| 288.5                                                                                                                 | 2.41                    | 9.653                           | 295.9                    | 6.03                                      | 3.72                    | 0.10                       | 62.9                                        | 133.3                                                       |
| 289.4                                                                                                                 | 2.49                    | 9.131                           | 295.9                    | 5.89                                      | 4.08                    | 0.11                       | 62.8                                        | 133.1                                                       |
| 292.4                                                                                                                 | 2.71                    | 7.601                           | 295.9                    | 5.92                                      | 5.31                    | 0.16                       | 62.6                                        | 132.2                                                       |
| 295.4                                                                                                                 | 2.49                    | 5.400                           | 295.9                    | 5.89                                      | 6.87                    | 0.20                       | 62.3                                        | 131.3                                                       |
| 298.3                                                                                                                 | 2.29                    | 3.953                           | 295.9                    | 5.93                                      | 8.60                    | 0.24                       | 62.1                                        | 130.3                                                       |
| 301.4                                                                                                                 | 2.28                    | 2.975                           | 295.9                    | 5.95                                      | 11.39                   | 0.31                       | 61.8                                        | 129.6                                                       |
| 304.2                                                                                                                 | 2.26                    | 2.357                           | 295.9                    | 1.96                                      | 14.21                   | 0.38                       | 61.6                                        | 128.8                                                       |
| 307.3                                                                                                                 | 2.42                    | 1.924                           | 295.9                    | 1.96                                      | 18.62                   | 0.49                       | 61.3                                        | 128.2                                                       |
| 310.2                                                                                                                 | 2.41                    | 1.557                           | 295.9                    | 1.99                                      | 22.95                   | 0.60                       | 61.1                                        | 127.3                                                       |
| 313.3                                                                                                                 | 4.14                    | 2.081                           | 295.9                    | 1.84                                      | 29.48                   | 0.76                       | 60.8                                        | 126.6                                                       |
| 316.2                                                                                                                 | 2.35                    | 0.985                           | 295.9                    | 1.97                                      | 35.37                   | 0.91                       | 60.6                                        | 125.5                                                       |
| 319.2                                                                                                                 | 2.16                    | 0.725                           | 295.9                    | 1.98                                      | 44.23                   | 1.13                       | 60.3                                        | 124.8                                                       |
| 322.2                                                                                                                 | 2.41                    | 0.664                           | 295.9                    | 1.05                                      | 53.73                   | 1.37                       | 60.1                                        | 123.9                                                       |
| 325.1                                                                                                                 | 2.67                    | 0.586                           | 295.9                    | 1.03                                      | 67.44                   | 1.71                       | 59.8                                        | 123.3                                                       |
| 328.1                                                                                                                 | 2.44                    | 0.437                           | 295.9                    | 1.05                                      | 82.62                   | 2.09                       | 59.6                                        | 122.6                                                       |
| 331.2                                                                                                                 | 2.53                    | 0.374                           | 295.9                    | 1.02                                      | 100.02                  | 2.53                       | 59.3                                        | 121.7                                                       |
| 334.1                                                                                                                 | 2.46                    | 0.298                           | 295.9                    | 1.05                                      | 122.20                  | 3.08                       | 59.1                                        | 121.0                                                       |
| 337.2                                                                                                                 | 2.79                    | 0.285                           | 295.9                    | 1.07                                      | 144.58                  | 3.64                       | 58.8                                        | 120.0                                                       |
| 338.2                                                                                                                 | 2.78                    | 0.263                           | 295.9                    | 1.05                                      | 156.03                  | 3.93                       | 58.7                                        | 119.9                                                       |
| $n$ -propyl 2-hydroxybenzoate; $\Delta_l^g H_m^o(298.15 \text{ K}) = (65.9 \pm 0.3) \text{ kJ} \cdot \text{mol}^{-1}$ |                         |                                 |                          |                                           |                         |                            |                                             |                                                             |
| $\ln(p/p_{ref}) = \frac{320.6}{R} - \frac{92297.0}{RT} - \frac{88.6}{R} \ln \frac{T}{298.15}; p_{ref} = 1 \text{ Pa}$ |                         |                                 |                          |                                           |                         |                            |                                             |                                                             |
| 289.4                                                                                                                 | 3.81                    | 30.54                           | 294.0                    | 3.27                                      | 1.70                    | 0.05                       | 66.7                                        | 139.1                                                       |
| 292.2                                                                                                                 | 3.42                    | 21.00                           | 299.0                    | 2.00                                      | 2.25                    | 0.06                       | 66.4                                        | 138.4                                                       |
| 295.2                                                                                                                 | 1.82                    | 8.674                           | 294.0                    | 4.34                                      | 2.85                    | 0.08                       | 66.1                                        | 137.1                                                       |
| 298.2                                                                                                                 | 2.45                    | 8.819                           | 294.0                    | 4.34                                      | 3.79                    | 0.10                       | 65.9                                        | 136.3                                                       |
| 301.2                                                                                                                 | 3.06                    | 8.674                           | 294.0                    | 4.34                                      | 4.79                    | 0.12                       | 65.6                                        | 135.2                                                       |
| 304.2                                                                                                                 | 3.40                    | 7.228                           | 296.4                    | 4.34                                      | 6.43                    | 0.19                       | 65.3                                        | 134.6                                                       |
| 307.2                                                                                                                 | 5.21                    | 8.674                           | 296.4                    | 4.34                                      | 8.23                    | 0.23                       | 65.1                                        | 133.7                                                       |
| 310.2                                                                                                                 | 3.01                    | 3.976                           | 296.4                    | 4.34                                      | 10.37                   | 0.28                       | 64.8                                        | 132.7                                                       |
| 313.2                                                                                                                 | 3.26                    | 3.273                           | 296.4                    | 3.27                                      | 13.63                   | 0.37                       | 64.6                                        | 132.1                                                       |
| 316.3                                                                                                                 | 4.03                    | 3.273                           | 296.4                    | 3.27                                      | 16.83                   | 0.45                       | 64.3                                        | 131.0                                                       |
| 319.3                                                                                                                 | 4.19                    | 2.727                           | 299.0                    | 3.27                                      | 21.20                   | 0.56                       | 64.0                                        | 130.2                                                       |
| 322.3                                                                                                                 | 3.81                    | 2.000                           | 299.0                    | 2.00                                      | 26.27                   | 0.68                       | 63.7                                        | 129.3                                                       |
| 323.3                                                                                                                 | 3.92                    | 1.890                           | 297.2                    | 2.84                                      | 28.44                   | 0.74                       | 63.7                                        | 129.0                                                       |
| 325.3                                                                                                                 | 3.93                    | 1.667                           | 299.0                    | 2.00                                      | 32.53                   | 0.84                       | 63.5                                        | 128.4                                                       |
| 328.3                                                                                                                 | 3.91                    | 1.333                           | 299.0                    | 2.00                                      | 40.42                   | 1.04                       | 63.2                                        | 127.6                                                       |
| 331.3                                                                                                                 | 4.30                    | 1.167                           | 299.0                    | 2.00                                      | 50.87                   | 1.30                       | 62.9                                        | 127.0                                                       |
| 334.3                                                                                                                 | 4.26                    | 0.933                           | 297.2                    | 2.00                                      | 62.48                   | 1.59                       | 62.7                                        | 126.2                                                       |
| 337.3                                                                                                                 | 4.31                    | 0.767                           | 297.2                    | 2.00                                      | 76.97                   | 1.95                       | 62.4                                        | 125.5                                                       |
| 340.2                                                                                                                 | 3.31                    | 0.500                           | 297.2                    | 2.00                                      | 90.81                   | 2.30                       | 62.2                                        | 124.5                                                       |
| 343.5                                                                                                                 | 5.72                    | 0.692                           | 297.2                    | 2.77                                      | 113.22                  | 2.86                       | 61.9                                        | 123.7                                                       |
| 346.3                                                                                                                 | 5.28                    | 0.533                           | 297.2                    | 2.00                                      | 135.59                  | 3.41                       | 61.6                                        | 123.1                                                       |
| 349.4                                                                                                                 | 9.08                    | 0.738                           | 297.2                    | 2.77                                      | 168.29                  | 4.23                       | 61.3                                        | 122.5                                                       |

|                                                                                                                                                                                                                                                             |      |       |       |      |        |      |      |       |
|-------------------------------------------------------------------------------------------------------------------------------------------------------------------------------------------------------------------------------------------------------------|------|-------|-------|------|--------|------|------|-------|
| 352.2                                                                                                                                                                                                                                                       | 7.10 | 0.500 | 297.2 | 2.00 | 194.38 | 4.88 | 61.1 | 121.6 |
| 355.3                                                                                                                                                                                                                                                       | 8.59 | 0.500 | 297.2 | 2.00 | 235.09 | 5.90 | 60.8 | 120.9 |
| $n$ -butyl 2-hydroxybenzoate; $\Delta_l^g H_m^o(298.15 \text{ K}) = (69.7 \pm 0.3) \text{ kJ} \cdot \text{mol}^{-1}$<br>$\ln(p/p_{\text{ref}}) = \frac{332.8}{R} - \frac{98621.9}{RT} - \frac{96.9}{R} \ln \frac{T}{298.15}; p_{\text{ref}} = 1 \text{ Pa}$ |      |       |       |      |        |      |      |       |
| 297.2                                                                                                                                                                                                                                                       | 4.15 | 44.86 | 297.8 | 3.43 | 1.18   | 0.03 | 69.8 | 140.7 |
| 300.2                                                                                                                                                                                                                                                       | 6.06 | 49.24 | 297.4 | 3.40 | 1.57   | 0.04 | 69.5 | 139.7 |
| 303.2                                                                                                                                                                                                                                                       | 5.16 | 32.00 | 297.5 | 3.20 | 2.06   | 0.06 | 69.2 | 138.7 |
| 305.2                                                                                                                                                                                                                                                       | 5.15 | 27.14 | 296.6 | 2.86 | 2.41   | 0.07 | 69.1 | 137.9 |
| 308.2                                                                                                                                                                                                                                                       | 3.50 | 14.15 | 298.4 | 3.40 | 3.16   | 0.08 | 68.8 | 137.0 |
| 311.2                                                                                                                                                                                                                                                       | 1.77 | 5.660 | 297.4 | 3.40 | 3.99   | 0.10 | 68.5 | 135.8 |
| 311.2                                                                                                                                                                                                                                                       | 3.90 | 12.45 | 297.7 | 3.40 | 4.00   | 0.10 | 68.5 | 135.9 |
| 314.3                                                                                                                                                                                                                                                       | 1.97 | 4.811 | 297.4 | 3.40 | 5.20   | 0.16 | 68.2 | 134.9 |
| 314.3                                                                                                                                                                                                                                                       | 3.83 | 9.623 | 297.5 | 3.40 | 5.08   | 0.15 | 68.2 | 134.7 |
| 317.2                                                                                                                                                                                                                                                       | 4.56 | 8.573 | 298.2 | 3.43 | 6.79   | 0.19 | 67.9 | 134.3 |
| 320.2                                                                                                                                                                                                                                                       | 4.53 | 6.792 | 297.4 | 3.40 | 8.49   | 0.24 | 67.6 | 133.2 |
| 323.4                                                                                                                                                                                                                                                       | 0.58 | 0.674 | 298.4 | 1.99 | 10.98  | 0.30 | 67.3 | 132.3 |
| 323.4                                                                                                                                                                                                                                                       | 4.32 | 5.067 | 297.0 | 3.20 | 10.83  | 0.30 | 67.3 | 132.2 |
| 326.3                                                                                                                                                                                                                                                       | 5.49 | 5.067 | 297.0 | 3.20 | 13.78  | 0.37 | 67.0 | 131.5 |
| 329.2                                                                                                                                                                                                                                                       | 3.13 | 2.400 | 298.0 | 3.20 | 16.66  | 0.44 | 66.7 | 130.4 |
| 332.2                                                                                                                                                                                                                                                       | 7.26 | 4.373 | 297.0 | 3.20 | 21.10  | 0.55 | 66.4 | 129.6 |
| 335.2                                                                                                                                                                                                                                                       | 3.74 | 1.867 | 298.0 | 3.20 | 25.55  | 0.66 | 66.1 | 128.6 |
| 336.7                                                                                                                                                                                                                                                       | 4.75 | 2.105 | 297.0 | 3.16 | 28.65  | 0.74 | 66.0 | 128.2 |
| 338.3                                                                                                                                                                                                                                                       | 5.08 | 1.981 | 296.2 | 3.40 | 32.49  | 0.84 | 65.8 | 127.9 |
| 338.4                                                                                                                                                                                                                                                       | 1.27 | 0.497 | 298.4 | 1.99 | 32.71  | 0.84 | 65.8 | 127.9 |
| 339.7                                                                                                                                                                                                                                                       | 4.39 | 1.579 | 297.0 | 3.16 | 35.31  | 0.91 | 65.7 | 127.4 |
| 341.2                                                                                                                                                                                                                                                       | 4.46 | 1.440 | 298.4 | 3.20 | 39.55  | 1.01 | 65.6 | 127.0 |
| 344.2                                                                                                                                                                                                                                                       | 4.09 | 1.067 | 298.4 | 3.20 | 48.95  | 1.25 | 65.3 | 126.3 |
| 346.2                                                                                                                                                                                                                                                       | 4.63 | 1.053 | 297.0 | 3.16 | 55.84  | 1.42 | 65.1 | 125.7 |
| 347.2                                                                                                                                                                                                                                                       | 4.15 | 0.907 | 298.4 | 3.20 | 58.39  | 1.48 | 65.0 | 125.3 |
| 347.2                                                                                                                                                                                                                                                       | 3.98 | 0.849 | 296.2 | 3.40 | 59.37  | 1.51 | 65.0 | 125.4 |
| 350.2                                                                                                                                                                                                                                                       | 4.53 | 0.800 | 298.4 | 3.20 | 72.34  | 1.83 | 64.7 | 124.6 |
| 353.2                                                                                                                                                                                                                                                       | 5.52 | 0.800 | 298.4 | 3.20 | 88.10  | 2.23 | 64.4 | 123.9 |
| 356.2                                                                                                                                                                                                                                                       | 6.71 | 0.816 | 298.2 | 3.16 | 104.87 | 2.65 | 64.1 | 123.0 |
| 359.7                                                                                                                                                                                                                                                       | 3.85 | 0.377 | 298.2 | 1.46 | 130.00 | 3.27 | 63.8 | 122.1 |
| 363.2                                                                                                                                                                                                                                                       | 4.74 | 0.377 | 298.2 | 1.46 | 159.91 | 4.02 | 63.4 | 121.1 |

<sup>a</sup> Saturation temperature measured with the standard uncertainty ( $u(T) = 0.1 \text{ K}$ ).

<sup>b</sup> Mass of transferred sample condensed at  $T = 243 \text{ K}$ .

<sup>c</sup> Volume of nitrogen ( $u(V) = 0.005 \text{ dm}^3$ ) used to transfer  $m$  ( $u(m) = 0.0001 \text{ g}$ ) of the sample. Uncertainties are given as standard uncertainties.

<sup>d</sup>  $T_a$  is the temperature of the soap bubble meter used for measurement of the gas flow.

<sup>e</sup> Vapour pressure at temperature  $T$ , calculated from the  $m$  and the residual vapour pressure at the condensation temperature calculated by an iteration procedure.

<sup>f</sup> Standard uncertainties were calculated with  $u(p_i/\text{Pa}) = 0.005 + 0.025(p_i/\text{Pa})$  for pressures below 5 Pa, and  $u(p_i/\text{Pa}) = 0.025 + 0.025(p_i/\text{Pa})$  for pressures from 5 to 3000 Pa. The standard uncertainties for  $T$ ,  $V$ ,  $p$ ,  $m$ , are standard uncertainties with 0.683 confidence level. Uncertainty of the vaporisation enthalpies  $U(\Delta_l^g H_m^o)$  are the expanded uncertainty (0.95 level of confidence) calculated according to procedure described elsewhere<sup>19</sup>. Uncertainties include uncertainties from the experimental conditions and the fitting equation, vapour pressures, and uncertainties from adjustment of vaporisation enthalpies to the reference temperature  $T = 298.15 \text{ K}$ .

**Table S5** The vapour pressures  $p$ , and standard vaporisation enthalpies and entropies obtained by the approximation of boiling points at different pressures available in the literature <sup>17</sup>.

| $T/$<br>K <sup>a</sup>                                                                                                               | $p/$<br>Pa | $\Delta_l^g H_m^o$ / <sup>a</sup><br>kJ·mol <sup>-1</sup> | $\Delta_l^g S_m^o/$<br>J·K <sup>-1</sup> ·mol <sup>-1</sup> |
|--------------------------------------------------------------------------------------------------------------------------------------|------------|-----------------------------------------------------------|-------------------------------------------------------------|
| ethyl 2-hydroxybenzoate; $\Delta_l^g H_m^o(298.15 \text{ K}) = (62.1 \pm 2.7) \text{ kJ} \cdot \text{mol}^{-1}$                      |            |                                                           |                                                             |
| $\ln(p/p_{\text{ref}}) = \frac{312.4}{R} - \frac{87235.7}{RT} - \frac{84.2}{R} \ln \frac{T}{298.15}; p_{\text{ref}} = 1 \text{ Pa}$  |            |                                                           |                                                             |
| 376.2                                                                                                                                | 1867       | 55.6                                                      | 114.6                                                       |
| 377.2                                                                                                                                | 1867       | 55.5                                                      | 114.0                                                       |
| 379.2                                                                                                                                | 1600       | 55.3                                                      | 111.5                                                       |
| 381.2                                                                                                                                | 1600       | 55.1                                                      | 110.3                                                       |
| 435.2                                                                                                                                | 14265      | 50.6                                                      | 100.1                                                       |
| 438.2                                                                                                                                | 14265      | 50.3                                                      | 98.7                                                        |
| 505.2                                                                                                                                | 101325     | 44.7                                                      | 88.6                                                        |
| 505.7                                                                                                                                | 101325     | 44.7                                                      | 88.4                                                        |
| 507.2                                                                                                                                | 101325     | 44.5                                                      | 87.9                                                        |
| $n$ -butyl 2-hydroxybenzoate; $\Delta_l^g H_m^o(298.15 \text{ K}) = (72.9 \pm 3.5) \text{ kJ} \cdot \text{mol}^{-1}$                 |            |                                                           |                                                             |
| $\ln(p/p_{\text{ref}}) = \frac{340.4}{R} - \frac{101750.6}{RT} - \frac{96.9}{R} \ln \frac{T}{298.15}; p_{\text{ref}} = 1 \text{ Pa}$ |            |                                                           |                                                             |
| 544.2                                                                                                                                | 101324.7   | 49.02                                                     | 90.2                                                        |
| 418.2                                                                                                                                | 2133.2     | 61.23                                                     | 114.4                                                       |
| 420.2                                                                                                                                | 2133.2     | 61.04                                                     | 113.3                                                       |
| 363.2                                                                                                                                | 159.9      | 66.56                                                     | 129.7                                                       |

<sup>a</sup> Uncertainty of the vaporisation enthalpy is expressed as twice the standard uncertainties. They include uncertainties from the fitting equation, and uncertainties from temperature adjustment to  $T = 298.15 \text{ K}$ . Uncertainties in the temperature adjustment of vaporisation enthalpies to the reference temperature  $T = 298.15 \text{ K}$  are estimated to account with 20 % to the total adjustment.

**Table S6** Compilation of the enthalpies of vaporisation,  $\Delta_l^g H_m^o$ , of methyl 2-hydroxybenzoate<sup>6</sup>

| Method <sup>a</sup> | <i>T</i> -range | <i>T</i> <sub>av</sub> | $\Delta_l^g H_m^o$<br><i>T</i> <sub>av</sub> | $\Delta_l^g H_m^o$<br>298.15 K <sup>b</sup> | Ref.    |
|---------------------|-----------------|------------------------|----------------------------------------------|---------------------------------------------|---------|
|                     | K               | K                      | kJ·mol <sup>-1</sup>                         | kJ·mol <sup>-1</sup>                        |         |
| S                   | 341.9-495.6     | 418.8                  | 52.7±0.2                                     | 61.2±1.7                                    | 20      |
| S                   | 352.1-493.6     | 422.9                  | 52.4±0.2                                     | 61.0±1.7                                    | 21      |
| n/a                 | 327.2-496.4     | 411.8                  | 53.0±1.5                                     | 60.4±2.1                                    | 14      |
| n/a                 | 329-496         | 412.5                  | 52.4±1.5                                     | 60.7±2.2                                    | 16      |
| n/a                 | 288-333         | 310.5                  | 56.8±1.5                                     | 57.7±1.5                                    | 16      |
| TGA                 | 393-443         | 418.0                  | 52.3±2.5                                     | 60.9±3.0                                    | 22      |
| T                   | 263.5-303.5     | 283.5                  | 61.3±0.6                                     | 60.2±0.7                                    | 23      |
| TGA                 | 296-316         | 306.0                  | 64.4±1.4                                     | 65.0±1.4                                    | 1       |
| CGC                 | 298.15          |                        |                                              | 56.2±3.0                                    | 24      |
| CGC                 | 298.15          |                        |                                              | 62.0±3.6                                    | 25      |
| CGC                 | 298.15          |                        |                                              | 62.1±1.2                                    | 26      |
| CGC                 | 298.15          |                        |                                              | 61.4±2.4                                    | 27      |
| CGC                 | 298.15          |                        |                                              | 63.1±1.4                                    | 28      |
| CGC                 | 298.15          |                        |                                              | 62.1±1.6                                    | 29      |
| T                   | 278.3-343.2     | 310.8                  | 58.6±0.6                                     | 59.2±0.7                                    | 30      |
| T                   | 318.4-348.3     | 333.4                  | 56.8±0.4                                     | 59.3±0.5                                    | 6       |
|                     |                 |                        |                                              | <b>59.9±0.2<sup>c</sup></b>                 | average |

<sup>a</sup> Methods: S = static method; TGA = thermogravimetry; CGC = correlation gas-chromatography; T = transpiration method; n/a = method was not available.

<sup>b</sup> Vapour pressures available in the literature were treated using Eqs. (S1) and (S2) with help of heat capacity differences from Table S3 to calculate the enthalpies of vaporisation at 298.15 K. Uncertainties of the vaporisation enthalpies  $U(\Delta_l^g H_m^o)$  are the expanded uncertainties (0.95 level of confidence). They include uncertainties from the fitting equation and uncertainties from temperature adjustment to  $T = 298.15$  K. Uncertainties in the temperature adjustment of vaporisation enthalpies to the reference temperature  $T = 298.15$  K are estimated to account with 20% to the total adjustment

<sup>c</sup> Weighted mean value (uncertainties were taken as the weighting factor). Value in bold was recommended for further thermochemical calculations.

**Table S7** Thermochemical data at  $T = 298.15$  K ( $p^o = 0.1$  MPa) for reference compounds (in kJ·mol<sup>-1</sup>)<sup>a</sup>

| Compound                 | $\Delta_l^g H_m^o$ 31  | Compound                 | $\Delta_l^g H_m^o$ 32 |
|--------------------------|------------------------|--------------------------|-----------------------|
| methyl glycolate         | 52.5±0.2 <sup>33</sup> | methyl acetate           | 32.3±0.2              |
| methyl lactate           | 50.2±0.4               | ethyl acetate            | 35.6±0.2              |
| ethyl lactate            | 52.8±0.4               | <i>n</i> -propyl acetate | 39.1±0.2              |
| <i>n</i> -propyl lactate | 56.1±0.5               | <i>n</i> -butyl acetate  | <b>43.6±0.4</b>       |
| <i>n</i> -butyl lactate  | 60.2±0.5               | <i>n</i> -pentyl acetate | <b>48.6±0.2</b>       |
| <i>n</i> -pentyl lactate | 64.9±0.7               | <i>n</i> -hexyl acetate  | 51.9±0.3              |
| <i>n</i> -hexyl lactate  | 69.7±1.2               |                          |                       |
| <i>n</i> -octyl lactate  | 78.6±1.6               |                          |                       |
| <i>n</i> -decyl lactate  | 89.0±2.2               |                          |                       |

<sup>a</sup> The uncertainties in this table are given as two times the standard deviation.



**Table S8** Correlation of vaporization enthalpies  $\Delta_1^g H_m^o(298.15 \text{ K})$  of alkyl salicylates with the their  $T_b$  (normal boiling temperatures)<sup>a</sup>

| R              | Compound                    | $T_b^b$<br>K | $\Delta_1^g H_m^o(298.15 \text{ K})_{\text{exp}}$<br>kJ·mol <sup>-1</sup> | $\Delta_1^g H_m^o(298.15 \text{ K})_{\text{calc}}^c$<br>kJ·mol <sup>-1</sup> | $\Delta^d$<br>kJ·mol <sup>-1</sup> |
|----------------|-----------------------------|--------------|---------------------------------------------------------------------------|------------------------------------------------------------------------------|------------------------------------|
| C <sub>1</sub> | methyl salicylate           | 495.2        | 59.9±0.2 [Table S6]                                                       | 60.0                                                                         | -0.1                               |
| C <sub>2</sub> | ethyl salicylate            | 507.2        | 62.1±0.6 [Table S4]                                                       | 62.5                                                                         | -0.5                               |
| C <sub>3</sub> | <i>n</i> -propyl salicylate | 519.2        | 65.9±0.4 [Table S4]                                                       | 64.9                                                                         | 1.0                                |
| C <sub>4</sub> | <i>n</i> -butyl salicylate  | 544.2        | 69.7±0.4 [Table S4]                                                       | 70.0                                                                         | -0.3                               |

<sup>a</sup> The uncertainties in this table are given as two times the standard deviation.

<sup>b</sup> Normal boiling temperatures are from Ref. <sup>17</sup>.

<sup>c</sup> Calculated using Eq. (10) from the main text.

<sup>d</sup> Difference between experimental and calculated values.

**Table S9** Correlation of vaporisation enthalpies,  $\Delta_1^g H_m^o(298.15 \text{ K})$ , of alkyl 2-hydroxybenzoates with their Kovats indices ( $J_x$ )

| R              | Compound                    | $J_x^a$ | $\Delta_1^g H_m^o(298 \text{ K})_{\text{exp}}$<br>kJ·mol <sup>-1</sup> | $\Delta_1^g H_m^o(298 \text{ K})_{\text{calc}}^b$<br>kJ·mol <sup>-1</sup> | $\Delta^c$<br>kJ·mol <sup>-1</sup> |
|----------------|-----------------------------|---------|------------------------------------------------------------------------|---------------------------------------------------------------------------|------------------------------------|
| C <sub>1</sub> | methyl salicylate           | 1181    | 59.9±0.2 [Table S6]                                                    | 59.6                                                                      | 0.3                                |
| C <sub>2</sub> | ethyl salicylate            | 1257    | 62.1±0.6 [Table S4]                                                    | 62.4                                                                      | -0.4                               |
| C <sub>3</sub> | <i>n</i> -propyl salicylate | 1357    | 65.9±0.4 [Table S4]                                                    | 66.0                                                                      | -0.1                               |
| C <sub>4</sub> | <i>n</i> -butyl salicylate  | 1457    | 69.7±0.4 [Table S4]                                                    | 69.6                                                                      | 0.1                                |

<sup>a</sup> Kovats indices,  $J_x$ , on the standard non-polar column SE-30, program <sup>34</sup>.

<sup>b</sup> Calculated using Eq. (11, main text) with the assessed expanded uncertainty of ±0.5 kJ·mol<sup>-1</sup> (0.95 level of confidence,  $k = 2$ )

<sup>c</sup> Difference between column 4 and 5 in this table.

**Table S10** Correlation of vaporisation enthalpies,  $\Delta_1^g H_m^o(298.15 \text{ K})$ , of alkyl 2-hydroxybenzoates with their Kovats indices ( $J_x$ )

| R              | Compound                    | $J_x^a$ | $\Delta_1^g H_m^o(298 \text{ K})_{\text{exp}}$<br>kJ·mol <sup>-1</sup> | $\Delta_1^g H_m^o(298 \text{ K})_{\text{calc}}^b$<br>kJ·mol <sup>-1</sup> | $\Delta^c$<br>kJ·mol <sup>-1</sup> |
|----------------|-----------------------------|---------|------------------------------------------------------------------------|---------------------------------------------------------------------------|------------------------------------|
| C <sub>1</sub> | methyl salicylate           | 1176.5  | 59.9±0.2 [Table S6]                                                    | 59.6                                                                      | 0.3                                |
| C <sub>2</sub> | ethyl salicylate            | 1249    | 62.1±0.6 [Table S4]                                                    | 62.2                                                                      | -0.2                               |
| C <sub>3</sub> | <i>n</i> -propyl salicylate | 1357    | 65.9±0.4 [Table S4]                                                    | 66.0                                                                      | -0.1                               |
| C <sub>4</sub> | <i>n</i> -butyl salicylate  | 1455    | 69.7±0.4 [Table S4]                                                    | 69.5                                                                      | 0.2                                |

<sup>a</sup> Kovats indices,  $J_x$ , on the standard non-polar column SE-30 <sup>35</sup> at 373 K.

<sup>b</sup> Calculated using Eq. (12, main text) with the assessed expanded uncertainty of ±0.5 kJ·mol<sup>-1</sup> (0.95 level of confidence,  $k = 2$ )

<sup>c</sup> Difference between column 4 and 5 in this table.

**Table S11** Thermochemical data at  $T = 298.15$  K ( $p^\circ = 0.1$  MPa) for reference compounds (in  $\text{kJ}\cdot\text{mol}^{-1}$ )

| Compound                       | $\Delta_f H_m^\circ(\text{cr,liq})$ | $\Delta_f^q H_m^\circ$       | $\Delta_f H_m^\circ(\text{g})_{\text{exp.}}$ |
|--------------------------------|-------------------------------------|------------------------------|----------------------------------------------|
| benzene (liq)                  | $49.0 \pm 0.9$ <sup>36</sup>        | $33.9 \pm 0.1$ <sup>36</sup> | $82.9 \pm 0.9$ <sup>36</sup>                 |
| phenol (liq)                   |                                     | $58.0 \pm 0.6$ <sup>37</sup> | $-92.5 \pm 1.2$ <sup>37, 38</sup>            |
| methoxy benzene(liq)           | $-116.9 \pm 0.7$ <sup>37</sup>      | $46.4 \pm 0.2$ <sup>37</sup> | $-70.3 \pm 0.7$ <sup>37</sup>                |
| methyl benzoate (liq)          | $-334.1 \pm 1.3$ <sup>39</sup>      | $56.6 \pm 0.1$ <sup>39</sup> | $-273.5 \pm 0.8$ <sup>39</sup>               |
| ethyl benzoate (liq)           | $-365.2 \pm 0.9$ <sup>39</sup>      | $59.9 \pm 0.7$ <sup>39</sup> | $-305.3 \pm 1.1$ <sup>39</sup>               |
| <i>n</i> -propyl benzoate(liq) |                                     | $65.6 \pm 0.6$ <sup>40</sup> | $-327.3 \pm 2.0$ <sup>a</sup>                |
| <i>n</i> -butyl benzoate (liq) |                                     | $70.1 \pm 0.8$ <sup>40</sup> | $-348.3 \pm 2.0$ <sup>b</sup>                |
| methyl 4-hydroxybenzoate (cr)  | $-563.5 \pm 1.4$ <sup>6</sup>       |                              | $455.6 \pm 1.4$ <sup>6</sup>                 |

<sup>a</sup> Calculated based on the  $\Delta_f H_m^\circ(\text{g})$  of ethyl benzoate from this table and the difference between *n*-propyl-benzene and ethyl-benzene with their  $\Delta_f H_m^\circ(\text{g})$ -values from Pedley *et al.* <sup>41</sup>.

<sup>b</sup> Calculated based on the  $\Delta_f H_m^\circ(\text{g})$  of *n*-propyl benzoate from this table and the difference between *n*-butyl-benzene and *n*-propyl-benzene with their  $\Delta_f H_m^\circ(\text{g})$ -values from Pedley *et al.* <sup>41</sup>.

**Table S12** Theoretical gas-phase enthalpies of formation  $\Delta_f H_m^\circ(\text{g})$  at  $T = 298.15$  K ( $p^\circ = 0.1$  MPa) for 2-hydroxybenzoates as calculated by different methods (in  $\text{kJ}\cdot\text{mol}^{-1}$ ).<sup>a</sup>

| Compound                           | G3MP2  | G4     | G4                    | G3                     | W1-F-12               |
|------------------------------------|--------|--------|-----------------------|------------------------|-----------------------|
| methyl 2-hydroxybenzoate           | -481.7 | -478.4 | $-476.3$ <sup>1</sup> | $-479.7$ <sup>42</sup> | $-474.2$ <sup>b</sup> |
| ethyl 2-hydroxybenzoate            | -516.7 | -511.9 | $-510.2$ <sup>2</sup> |                        |                       |
| <i>n</i> -propyl 2-hydroxybenzoate | -537.4 | -532.4 |                       |                        |                       |
| <i>n</i> -butyl 2-hydroxybenzoate  | -558.3 | -553.4 |                       |                        |                       |

<sup>a</sup> Calculated according to the standard atomization procedure.

<sup>b</sup> Calculated in this work.

## Notes and references

1. J. M. Ledo, H. Flores, J. M. Solano-Altamirano, F. Ramos, J. M. Hernández-Pérez, E. A. Camarillo, B. Rabell and M. P. Amador, *J. Chem. Thermodyn.*, 2018, **124**, 1-9.
2. J. M. Ledo, H. Flores, J. M. Hernández-Pérez, F. Ramos, E. A. Camarillo and J. M. Solano-Altamirano, *J. Chem. Thermodyn.*, 2018, **116**, 176-184.
3. <https://us.vwr.com/store/product/9567923/propyl-salicylate-98-0>.
4. S. V. Lisina, A. K. Brel', L. S. Mazanova and A. A. Spasov, *Pharm. Chem. J.*, 2008, **42**, 574-576.
5. S. P. Verevkin, *J. Chem. Thermodyn.*, 1999, **31**, 559-585.
6. A. R. Ibragimova, M. A. Varfolomeev, R. N. Nagrimanov and S. P. Verevkin, *J. Chem. Thermodyn.*, 2023, submitted.
7. J. S. Chickos, S. Hosseini, D. G. Hesse and J. F. Liebman, *Struct. Chem.*, 1993, **4**, 271-278.
8. J. S. Chickos and W. E. J. Acree, *J. Phys. Chem. Ref. Data*, 2002, **31**, 537-698.
9. S. P. Verevkin and C. Schick, *J. Chem. Eng. Data*, 2000, **45**, 946-952.
10. V. N. Emel'yanenko, S. P. Verevkin and A. Heintz, *J. Am. Chem. Soc.*, 2007, **129**, 3930-3937.
11. W. N. Hubbard, D. W. Scott and G. Waddington, in *Experimental Thermochemistry*, ed. F. D. Rossini, Interscience, New York, 1956, vol. 1, pp. 75-127.
12. D. Kulikov, S. P. Verevkin and A. Heintz, *J. Chem. Eng. Data*, 2001, **46**, 1593-1600.
13. S. P. Verevkin and V. N. Emel'yanenko, *Fluid Phase Equilibria*, 2008, **266**, 64-75.
14. D. R. Stull, *Ind. Eng. Chem.*, 1947, **39**, 517-540.
15. G. W. A. Kahlbaum, *Berichte der deutschen chemischen Gesellschaft*, 1884, **17**, 1245-1262.
16. R. M. Stephenson and S. Malanowski, *Handbook of the Thermodynamics of Organic Compounds*, Dordrecht, Springer Netherlands, 1987.
17. J. Meija, T. B. Coplen, M. Berglund, W. A. Brand, P. De Bièvre, M. Gröning, N. E. Holden, J. Irrgeher, R. D. Loss, T. Walczyk and T. Prohaska, *Pure Appl. Chem.*, 2016, **88**, 265-291.
18. H. L. Thomas and H. Smith, *J. Appl. Chem.*, 1970, **20**, 33-36.
19. S. P. Verevkin, A. Y. Sazonova, V. N. Emel'yanenko, D. H. Zaitsau, M. A. Varfolomeev, B. N. Solomonov and K. V. Zherikova, *J. Chem. Eng. Data*, 2015, **60**, 89-103.
20. W. Ramsay and S. Young, *J. Chem. Soc., Trans.*, 1885, **47**, 640-657.
21. J. B. Matthews, J. F. Sumner and E. A. Moelwyn-Hughes, *Trans. Faraday Soc.*, 1950, **46**, 797-803.
22. Y. Cheng, Y. Huang, K. Alexander and D. Dollimore, *Thermochim. Acta*, 2001, **367-368**, 23-28.
23. D.E. Tevault, L.C. Buettner, K.L. Crouse, Report: Vapor Pressure of Methyl Salicylate and n-Hexadecane, Edgewood Chemical Biological Center Aberdeen Proving Ground [US], 2014.
24. M. Hoskovec, D. Grygarová, J. Cvačka, L. Streinz, J. Zima, S. P. Verevkin and B. Koutek, *J. Chromatogr. A*, 2005, **1083**, 161-172.
25. M. Temprado, M. V. Roux, P. Umnahanant, H. Zhao and J. S. Chickos, *J. Phys. Chem. B*, 2005, **109**, 12590-12595.
26. M. Temprado and J. S. Chickos, *Thermochim. Acta*, 2005, **435**, 49-56.
27. P. Umnahanant and J. S. Chickos, *J. Chem. Eng. Data*, 2005, **50**, 1720-1726.
28. S. Perişanu, I. Contineanu, M. D. Banciu, H. Zhao, N. Rath and J. Chickos, *Struct. Chem.*, 2006, **17**, 639-648.
29. P. Umnahanant and J. Chickos, *J. Pharm. Sci.*, 2011, **100**, 1847-1855.
30. G. Bikelytė, M. A. C. Härtel, T. M. Klapötke, B. Krumm and A. Sadaunykas, *J. Chem. Thermodyn.*, 2020, **143**, 106043.
31. V. N. Emel'yanenko, A. V. Yermalayeu, S. V. Portnova, A. A. Pimerzin and S. P. Verevkin, *J. Chem. Thermodyn.*, 2019, **128**, 55-67.
32. E. L. Krasnykh, S. P. Verevkin, B. Koutek and J. Doubisky, *J. Chem. Thermodyn.*, 2006, **38**, 717-723.

33. W. V. Steele, R. D. Chirico, S. E. Knipmeyer, A. Nguyen and N. K. Smith, *J. Chem. Eng. Data*, 1996, **41**, 1285-1302.
34. B. A. Vinogradov, retrieved from <http://viness.narod.ru>, 2004.
35. E. Tudor and D. Moldovan, *J. Chromatogr. A*, 1999, **848**, 215-227.
36. M. V. Roux, M. Temprado, J. S. Chickos and Y. Nagano, *J. Phys. Chem. Ref. Data*, 2008, **37**, 1855-1996.
37. S. P. Verevkin, *J. Therm. Anal. Calorim.*, 2022, **147**, 6073-6085.
38. O. V. Dorofeeva and O. N. Ryzhova, *J. Phys. Chem. A*, 2016, **120**, 2471-2479.
39. W. V. Steele, R. D. Chirico, A. B. Cowell, S. E. Knipmeyer and A. Nguyen, *J. Chem. Eng. Data*, 2002, **47**, 667-688.
40. H. Katayama, *J. Chem. Eng. Data*, 1988, **33**, 75-77.
41. J. P. Pedley, R. D. Naylor and S. P. Kirby, *Thermochemical Data of Organic Compounds*, 2nd Ed. Chapman and Hall, London, , 1986.
42. A. R. R. P. Almeida, A. F. G. Cunha, M. A. R. Matos, V. M. F. Morais and M. J. S. Monte, *J Chem. Thermodyn.*, 2014, **78**, 43-57.
